# Supplementary material for: Size-dependent modulation of fluorescence and light scattering: a new strategy for development of ratiometric sensing
Source: Royal Society of Chemistry journal article supplement (doi:10.1039/c7mh00872d), 2018-01-01
Supplement: c7mh00872d1.pdf [file c7mh00872d1.pdf]

1

## Supplementary Information

2 Size-dependent modulation of fluorescence and light  
3 scattering: a new strategy for development of ratiometric  
4 sensing

5 Shi Gang Liu <sup>a</sup>, Na Li <sup>a</sup>, Lei Han <sup>a</sup>, Ling Jie Li <sup>b</sup>, Nian Bing Li <sup>a\*</sup>, and Hong Qun Luo <sup>a\*</sup>

6 <sup>a</sup> Key Laboratory of Eco–environments in Three Gorges Reservoir Region (Ministry of Education),  
7 School of Chemistry and Chemical Engineering, Southwest University, Chongqing 400715,  
8 People’s Republic of China

9 <sup>b</sup> School of Chemistry and Chemical Engineering, Chongqing University, Chongqing 400044,  
10 People’s Republic of China

11

12 Corresponding Author. E-mail address: linb@swu.edu.cn (NB Li); luohq@swu.edu.cn (HQ Luo).

## 1 **Experimental section**

2       **Materials.** Citric acid, acetic acid (HAc), sodium acetate (NaAc), sodium  
3 hypochlorite (NaClO),  $\text{CoCl}_2 \cdot 6\text{H}_2\text{O}$ ,  $\text{Cu}(\text{NO}_3)_2 \cdot 3\text{H}_2\text{O}$ , and  $\text{Fe}(\text{NO}_3)_3 \cdot 9\text{H}_2\text{O}$  were  
4 obtained from Chengdu Kelong Chemical Reagent Plant (Sichuan, China).  
5 Hyperbranched polyethyleneimine (PEI,  $M_w = 600$ ), hydrogen tetrachloroaurate  
6 hydrate ( $\text{HAuCl}_4 \cdot 4\text{H}_2\text{O}$ ), and L-glutathione (GSH) were purchased from Aladdin Ltd.,  
7 Shanghai, China. Other reagents were of analytical reagent grade, and all the  
8 chemicals were used without further purification. Ultrapure water (18.2 M $\Omega$  cm) was  
9 used throughout the experiment. HAc-NaAc buffer (0.1 M) was prepared according to  
10 the standard protocol.

11       **Instruments.** The fluorescence and light-scattering spectra were collected on an  
12 F-2700 spectrofluorometer (Hitachi, Japan). The slits of both excitation and emission  
13 were fixed at 10 nm, and the photomultiplier tube (PMT) voltage was set at 400 V.  
14 UV-vis absorption spectra were recorded using a UV-vis 2450 spectrophotometer  
15 (Shimadzu, Japan). A KQ-250B ultrasonic bath (Kun Shan Ultrasonic Instruments  
16 Co., Ltd, China) was used to prepare CoOOH nanoflakes. Transmission electron  
17 microscopy (TEM) measurement was carried out with a JEM 1200EX transmission  
18 electron microscope (JEOL, Japan). Atomic force microscopy (AFM) characterization  
19 was performed on a Dimension Icon10800 atomic force microscope (Bruker,  
20 Germany). A PHS-3C pH meter (Shanghai Leici Instrument Company, Ltd., China)  
21 was utilized to detect pH values of solutions.

22       **Preparation of CoOOH Nanoflakes.** CoOOH nanoflakes were prepared

1 according to a previously reported method with minor modification.<sup>1-3</sup> Briefly, 300  
2  $\mu\text{L}$  of NaOH solution (1.0 M) was added to a vial and mixed with 1.0 mL of  $\text{CoCl}_2$   
3 solution (10 mM). After sonicating for 5 min, the mixture was centrifuged at 12,000  
4 rpm for 10 min and the precipitate was obtained and redispersed in 1.0 mL of  
5 ultrapure water. Then, 50  $\mu\text{L}$  of 0.9 M sodium hypochlorite solution was added, and  
6 the mixture was sonicated for 20 min. Subsequently, the resulting CoOOH nanoflake  
7 solution was centrifuged at 12,000 rpm for 10 min and the precipitate was obtained  
8 and washed three times with ultrapure water, and finally dispersed in 2.0 mL of  
9 ultrapure water.

10 **Preparation of Carbon Dots.** CDs were prepared in accordance with a  
11 published report with a slight change.<sup>4</sup> Typically, PEI (0.05 g) and citric acid (0.25 g)  
12 were dissolved in 5.0 mL of ultrapure water with ultrasonic treatment. The mixture  
13 was then transferred to a 25 mL Teflon-lined stainless steel autoclave and heated at  
14 180 °C for 2 h. After the reactor cooled down to room temperature naturally, the  
15 resulting solution was centrifuged at 2, 000 rpm for 10 min to remove large particles,  
16 and then the supernatant was dialyzed against water for 24 h through a dialysis film.  
17 The product inside the dialysis bag was lyophilized and redispersed in ultrapure water.  
18 The CDs solution with blue fluorescence was obtained.

19 **Procedures for Sensing Ascorbic Acid.** For AA ratiometric sensing by  
20 fluorescence and second-order scattering, the CDs/CoOOH nanoflakes system and  
21 sensing procedure are described as follows. 1.0 mL of CoOOH nanoflakes (8.0 mg  
22  $\text{mL}^{-1}$ ) and 250  $\mu\text{L}$  of CDs (2 mg  $\text{mL}^{-1}$ ) were mixed with 8.75 mL of ultrapure water.

1 The mixture was sonicated for 10 min, and then, the CDs/CoOOH nanoflakes system  
2 as the standardized sensing platform was prepared. To evaluate the sensitivity, 200  $\mu\text{L}$   
3 of CDs/CoOOH nanoflakes was added to 700  $\mu\text{L}$  of HAc-NaAc buffer (0.1 M, pH  
4 5.0), and the solution was mixed. Then 100  $\mu\text{L}$  of AA solution with various  
5 concentrations was added to the mixtures, followed by shaking well. The mixtures  
6 were equilibrated for 30 min before spectral measurements. At last, the fluorescence  
7 and scattering spectra were recorded under excitation at 350 nm. All measurements  
8 were carried out at room temperature. For sensing by using SODL-fluorescence, first-  
9 order scattering, and frequency doubling scattering, the CDs/CoOOH nanoflakes  
10 system was prepared by mixing 1.0 mL of CoOOH nanoflakes ( $8.0 \text{ mg mL}^{-1}$ ) and 250  
11  $\mu\text{L}$  of CDs ( $50 \text{ mg mL}^{-1}$ ) in 8.75 mL of ultrapure water, and fluorescence and  
12 scattering spectra were recorded under excitation at 700 nm. Other procedures were  
13 the same as described above.

14 **Preparation of Ag Nanoparticles.** Ag NPs were prepared by the well-known  
15 citrate reduction method.<sup>5</sup> Typically, 50 mL of  $\text{AgNO}_3$  solution (1 mM) was heated  
16 under gentle stir until it began to boil. Then, 2 mL of trisodium citrate (1%, w/v) was  
17 introduced dropwise to the  $\text{AgNO}_3$  solution. With continuous stirring, the mixed  
18 solution was boiled for an additional 15 min. Subsequently, the solution was cooled to  
19 room temperature and the resulting Ag NP solution with brown yellow was obtained.

20 **Procedures for ratiometric detection of  $\text{H}_2\text{O}_2$ .** For  $\text{H}_2\text{O}_2$  ratiometric sensing by  
21 combined fluorescence and SOS, the sensing procedures are described as follows.  
22 Quinine sulfate (100  $\mu\text{L}$ , 0.48  $\mu\text{M}$ ), Ag NPs (200  $\mu\text{L}$ ), and 100  $\mu\text{L}$  of PBS buffer (1/15

1 M, pH 6.5) were added to 500  $\mu$ L of water, and the solution was mixed. Then 100  $\mu$ L  
2 of H<sub>2</sub>O<sub>2</sub> solution with various concentrations was added to the mixture, followed by  
3 shaking well. The mixed solutions were incubated at 60 °C for 20 min before spectral  
4 measurements. At last, the fluorescence and SOS spectra were collected under  
5 excitation at 330 nm.

6 **Preparation of Glutathione-Protected Gold Nanoclusters.** GSH-protected Au  
7 NCs were synthesized according to Xie's reported method.<sup>6</sup> Typically, freshly  
8 prepared 0.50 mL of HAuCl<sub>4</sub> solution (20 mM) and GSH (100 mM, 0.15 mL) were  
9 mixed with 4.35 mL of ultrapure water. Then, the reaction mixture was heated at 70  
10 °C for 24 h under gentle stirring. After the resulting light-yellow solution was  
11 centrifuged at 2,000 rpm for 10 min to remove large particles, an Au NCs aqueous  
12 solution with strong orange emission was formed.

13 **Investigation of Metal Ions-Induced Fluorescence Quenching.** A 100  $\mu$ L  
14 amount of the as-synthesized GSH-Au NCs was mixed with 800  $\mu$ L of HAc-NaAc  
15 buffer (0.1 M, pH 5.0). Then, 100  $\mu$ L of Fe<sup>3+</sup> or Cu<sup>2+</sup> solution with various  
16 concentrations was added to the mixture, followed by shaking well. After 5 min, the  
17 fluorescence and scattering spectra were recorded under excitation at 365 nm. All  
18 measurements were performed at room temperature.

## 1 Additional figures

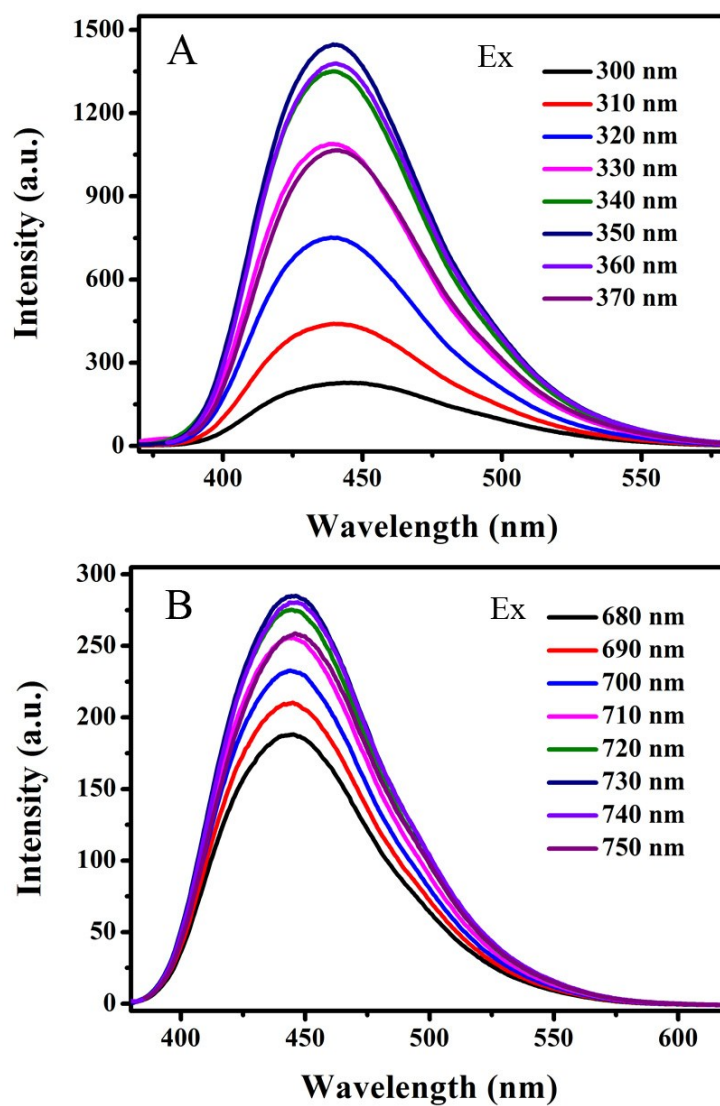

2

3 **Fig. S1.** Down-conversion fluorescence (20 mg L<sup>-1</sup>) (A) and SODL-fluorescence (500  
4 mg L<sup>-1</sup>) (B) spectra of CDs under different excitations.

5

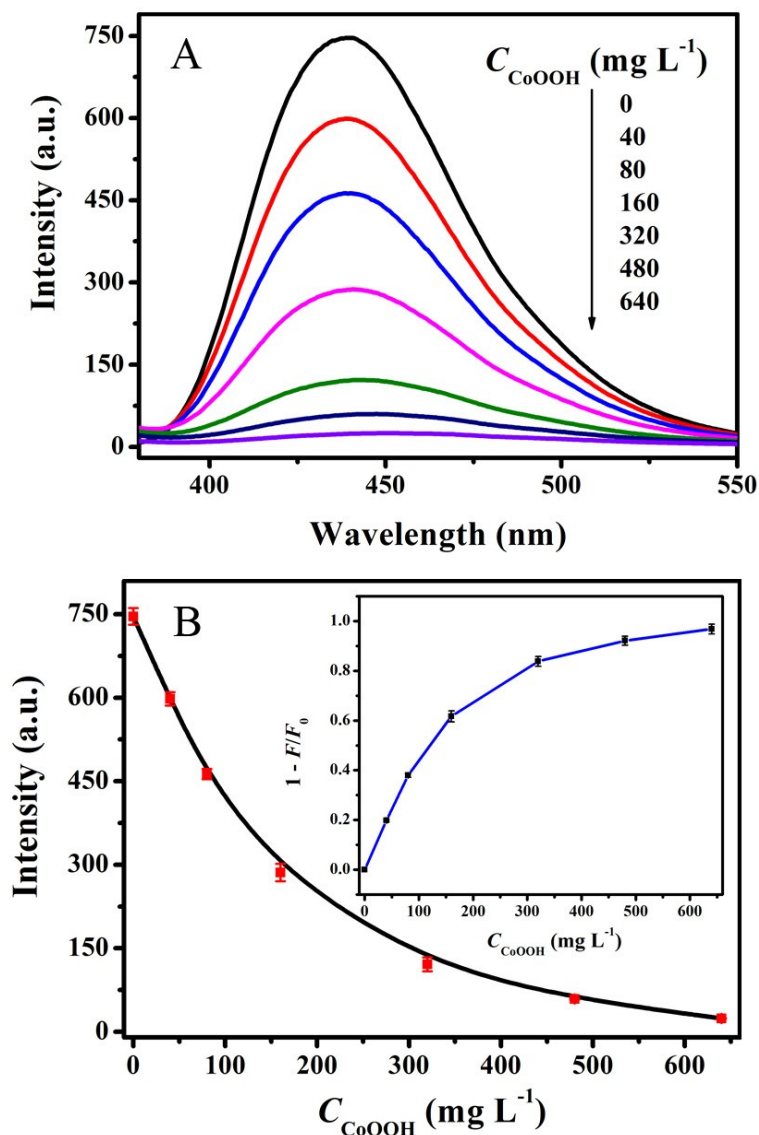

1

2 **Fig. S2.** Fluorescence quenching ability of CoOOH nanoflakes. (A) Fluorescence  
 3 emission spectra and (B) fluorescence intensities at 445 nm as a function of increasing  
 4 CoOOH nanoflake concentration. Inset of (B) is a relationship between quenching  
 5 efficiency ( $1 - F/F_0$ ) and CoOOH nanoflake concentration, where  $F$  and  $F_0$  denote the  
 6 fluorescence intensity in the presence and absence of CoOOH nanoflakes,  
 7 respectively. Conditions: excitation, 350 nm; CDs, 10  $\text{mg L}^{-1}$ ; NaAc-HAc buffer (pH  
 8 5.0).

9

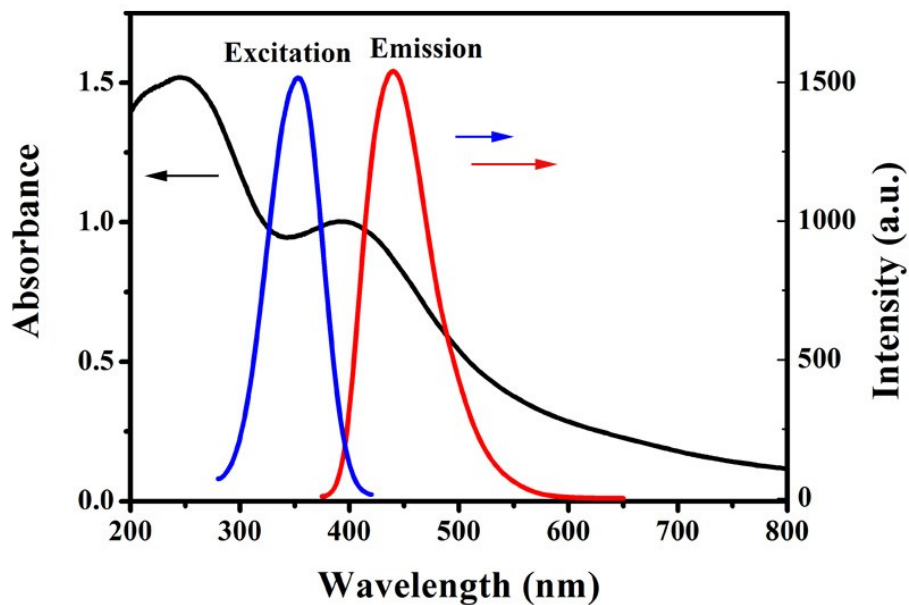

1  
 2 **Fig. S3.** UV-vis absorption spectrum of CoOOH nanoflakes ( $400 \text{ mg L}^{-1}$ , black curve),  
 3 down-conversion fluorescence excitation (blue curve) and emission spectra (red curve)  
 4 of the CDs ( $20 \text{ mg L}^{-1}$ ).

5

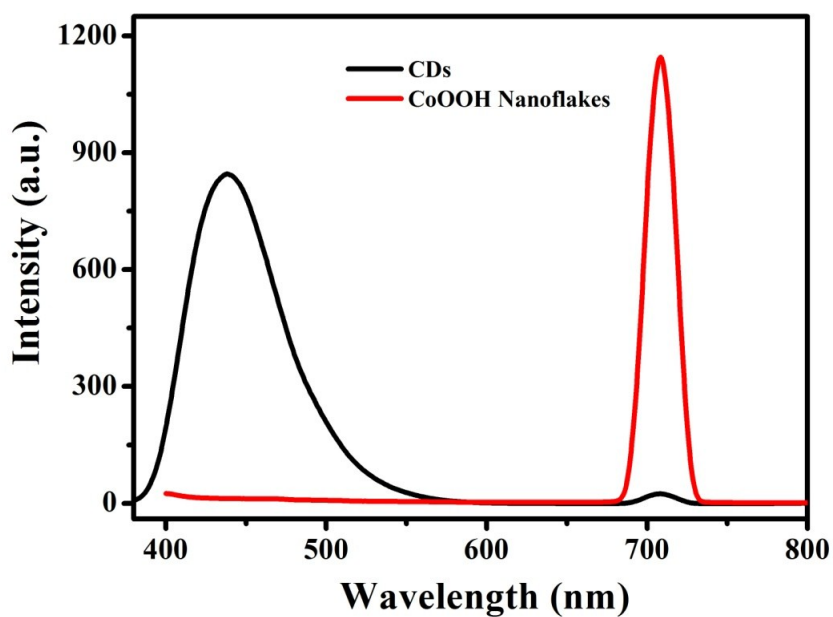

6  
 7 **Fig. S4.** SOS spectrum of CoOOH nanoflakes (red curve) down-conversion  
 8 fluorescence and SOS spectrum of CDs (black curve). Both excitations are 350 nm.  
 9 CDs,  $10 \text{ mg L}^{-1}$ ; CoOOH nanoflakes,  $160 \text{ mg L}^{-1}$ .





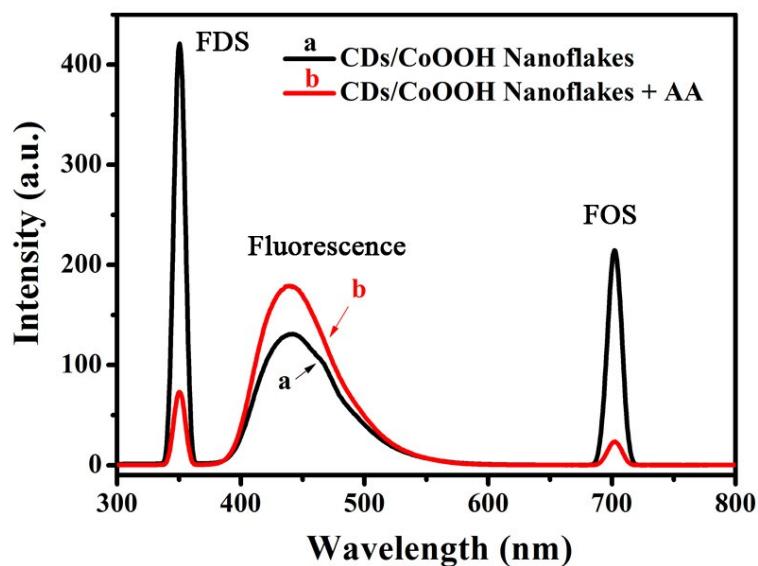

1

2 **Fig. S7.** SODL-fluorescence, FOS, and FDS spectra of CoOOH nanoflakes in the  
 3 absence (curve a) and presence of AA (curve b). Conditions: CDs, 250 mg L<sup>-1</sup>;  
 4 CoOOH nanoflakes, 160 mg L<sup>-1</sup>; AA, 200 μM; HAc-NaAc buffer (pH 5.0); excitation,  
 5 700 nm.

6

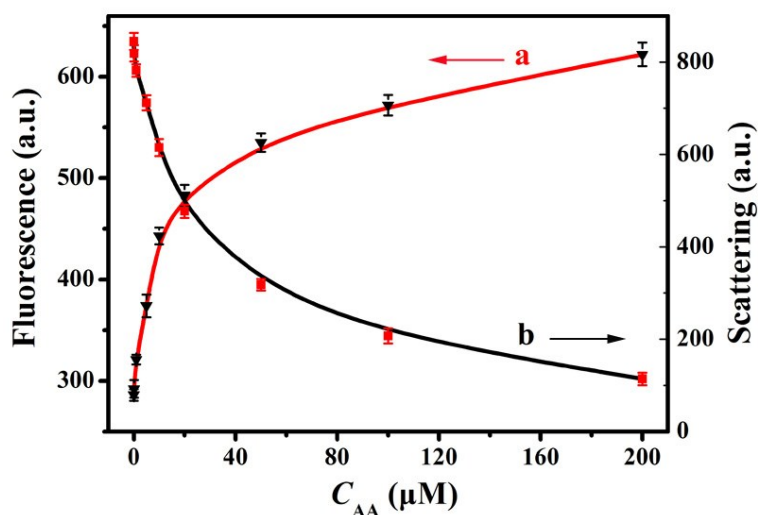

7

8 **Fig. S8.** Fluorescence intensity at 445 nm (curve a) and SOS intensity at 708 nm  
 9 (curve b) changes of the CDs/CoOOH nanoflakes system in the presence of various  
 10 concentrations of AA. Conditions: CDs, 10 mg L<sup>-1</sup>; CoOOH nanoflakes, 160 mg L<sup>-1</sup>;  
 11 HAc-NaAc buffer (pH 5.0); excitation, 350 nm.

12

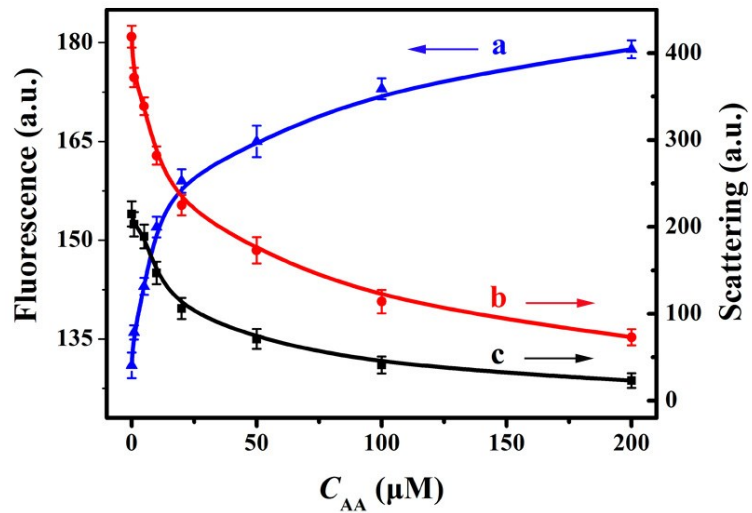

1

2 **Fig. S9.** SODL-fluorescence intensity (445 nm, curve a), FOS intensity (702 nm,  
 3 curve c), and FDS intensity (350 nm, curve b) changes of the CDs/CoOOH  
 4 nanoflakes system in the presence of various concentrations of AA. Conditions: CDs,  
 5 250 mg L<sup>-1</sup>; CoOOH nanoflakes, 160 mg L<sup>-1</sup>; HAc-NaAc buffer (pH 5.0); excitation,  
 6 700 nm.

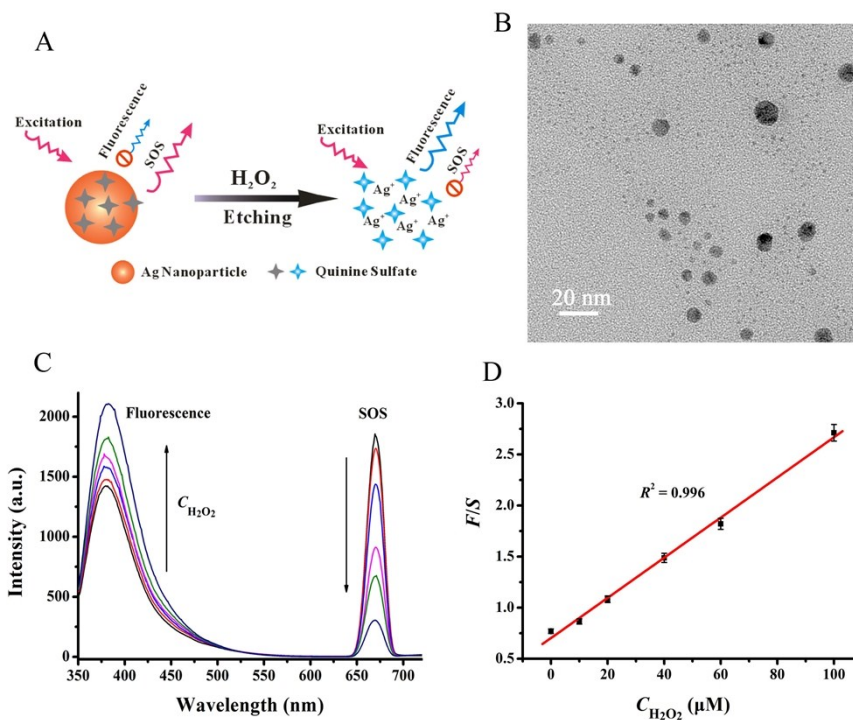

1

2 **Fig. S10.** (A) Schematic depiction of quinine sulfate/Ag NPs-based ratiometric optical sensor of  
 3 H<sub>2</sub>O<sub>2</sub> by the combination of fluorescence and SOS. (B) TEM image of Ag NPs. (C) Fluorescence  
 4 and SOS spectra of quinine sulfate/Ag NPs hybrid system after adding various concentrations of  
 5 H<sub>2</sub>O<sub>2</sub> (0, 10, 20, 60, 100, 200 μM). Excitation, 330 nm; PBS buffer, pH 6.5; quinine sulfate, 48  
 6 nM; Ag NPs, 200 μL mL<sup>-1</sup>. (D) Plot of linear relationship of  $F/S$  (where  $F$  and  $S$  denote  
 7 fluorescence and SOS intensity, respectively) versus the concentrations of H<sub>2</sub>O<sub>2</sub> ranging from 0 to  
 8 100 μM.

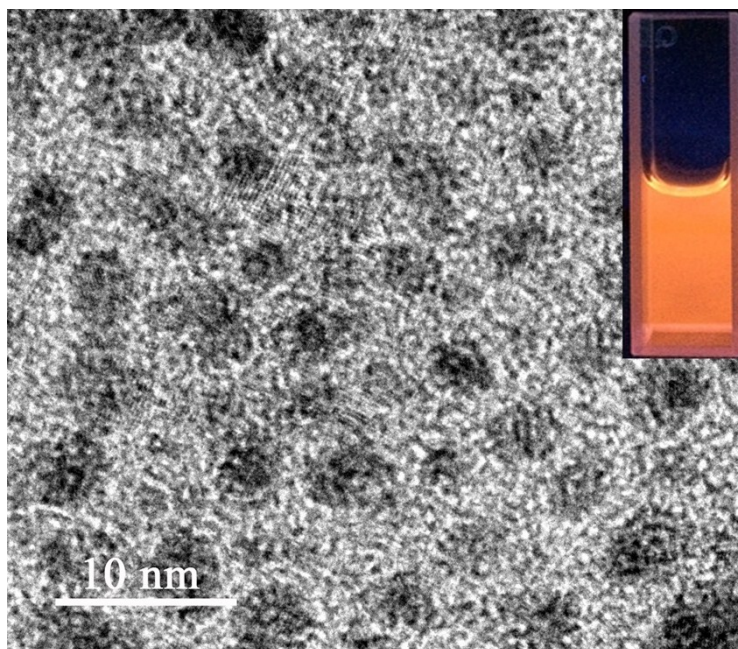

1

2 **Fig. S11.** TEM image of Au NCs and inset is a photograph of Au NCs under 365 nm  
3 UV light.

## 1 Supplementary References

- 2 (1) N. Li, Y. Li, Y. Han, W. Pan, T. Zhang, B. Tang, *Anal. Chem.*, **2014**, 86, 3924-  
3 3930.
- 4 (2) H. M. Meng, X. B. Zhang, C. Yang, H. Kuai, G. J. Mao, L. Gong, W. Zhang, S.  
5 Feng, J. Chang, *Anal. Chem.*, **2016**, 88, 6057-6063.
- 6 (3) G. Li, W. Kong, M. Zhao, S. Lu, P. Gong, G. Chen, L. Xia, H. Wang, J. You, Y.  
7 Wu, *Biosens. Bioelectron.*, **2016**, 79, 728-735.
- 8 (4) J. Y. Li, Y. Liu, Q. W. Shu, J. M. Liang, F. Zhang, X. P. Chen, X. Y. Deng, M.  
9 T. Swihart, K. J. Tan, *Langmuir*, **2017**, 33, 1043-1050.
- 10 (5) P. C. Lee, D. Meisel, *J. Phys. Chem. C*, 1982, 86, 3391-3395.
- 11 (6) Z. Luo, X. Yuan, Y. Yu, Q. Zhang, D. T. Leong, J. Y. Lee, J. Xie, *J. Am. Chem.*  
12 *Soc.*, **2012**, 134, 16662-16670.
- 13
